# Supplementary material for: Time and the etiology of Acute Kidney Injury define prognosis in the course of COVID-19
Source: Research Square preprint supplement (doi:10.21203/rs.3.rs-105205/v1), 2020-11-11
Supplement: Supplementary file 1 [file 20dea4cbfb318cac09930220.docx]

Supplement 1

Table. Characteristics and initial laboratory values of all patients who developed acute kidney injury.

| Age | 62,4 ± 14,2 |
| --- | --- |
| Sex (Male/Female) | 67 / 22 |
| Mean arterial pressure (mmHg) | 88,7 ± 13,7 |
| Hemoglobin (g/dl) | 12,3 ± 1,9 |
| eGFR (ml/min/1,73m2) | 82,6 ± 15,8 |
| CRP (mg/L) | 82,0 ± 77,8 |
| Lactate Dehydrogenase (IU/L) | 416 ± 331 |
| D-dimer (mg/L) | 1,9 ± 3,0 |
| Lymphocytes (per μL) | 1305 ± 654 |
| Creatine kinase (IU/L) | 274 ± 680 |
| Ferritin (ng/mL) | 629 ± 584 |
| Uric acid (mg/dL) | 5,6 ± 2,2 |

Table. Hospital stay length and prognosis of patients who developed acute kidney injury.

| Hospital Stay (days) | 13,3 ± 7,4 |
| --- | --- |
| AKI developed on (days) (excluding the AKIs seen on admission day) | 6,7 ± 5,4 |
| AKI Stage 1 (n ,(%))  AKI Stage 2 (n ,(%))  AKI Stage 3 (n ,(%)) | 68 , (76,4)  13 , (14,6)  8 (9) |
| Severe or critical clinical picture (n, (%)) | 43 , (48) |
| ICU requirement (n, (%)) | 31 (35) |
| Death (n, (%)) | 21 (23,5) |

ICU: Intensive Care Unit, AKI: Acute kidney injury
