# Supplementary material for: Time and the etiology of Acute Kidney Injury define prognosis in the course of COVID-19
Source: Research Square preprint supplement (doi:10.21203/rs.3.rs-105205/v1), 2020-11-11
Supplement: Supplementary file 2 [file ff91744a50230e9a9ec476b8.docx]

Supplement 2

Table: Different treatment modalities and renal replacement therapy requirement.

AKI: acute kidney injury Hq: hydroxychloroquine, RRT: renal replacement therapy, NS: not studied

|  | AKI on presentation  (n=29) | AKI in the first week  (n=33) | AKI after 7 days  (n=27) | p |
| --- | --- | --- | --- | --- |
| Antiviral Treatment  Hq  Hq+favipiravir  Hq+oseltamivir  Hq+oseltamivir+favipiravir  Hq+osemtamivir+favipiravir+lopinavir | 2  4  12  9  2 | 3  1  10  16  3 | -  4  2  18  3 | NS |
| Anticoagulant use  Steroids use  Tocilizumab | 20  5  5 | 21  1  6 | 22  5  13 | 0,376  0,131  0,014 |
| RRT requirement | 0 | 2 | 4 | 0,224 |
